# Supplementary material for: Effect of miR-183-5p on Cholestatic Liver Fibrosis by Regulating Fork Head Box Protein O1 Expression
Source: Front Physiol. 2021 Nov 18;12:737313. doi: 10.3389/fphys.2021.737313 (PMC8639207; doi:10.3389/fphys.2021.737313)
Supplement: Supplementary file 3 [file Data_Sheet_3.ZIP]

Archive with 5 entries (4 files):
- HE/
- HE/control antagomir BDL group.tif
- HE/control antagomir Sham group.tif
- HE/miR-183-5p antagomir BDL group.tif
- HE/miR-183-5p antagomir Sham group.tif
